# Supplementary material for: Urine Proteome Profiling Predicts Lung Cancer from Control Cases and Other Tumors
Source: PubMed Central journal article supplement — eBioMedicine. 2018 Mar 17;30:120–8. doi: 10.1016/j.ebiom.2018.03.009 (PMC5952250; doi:10.1016/j.ebiom.2018.03.009), 2018-03-17

**a****Urine proteomics workflow**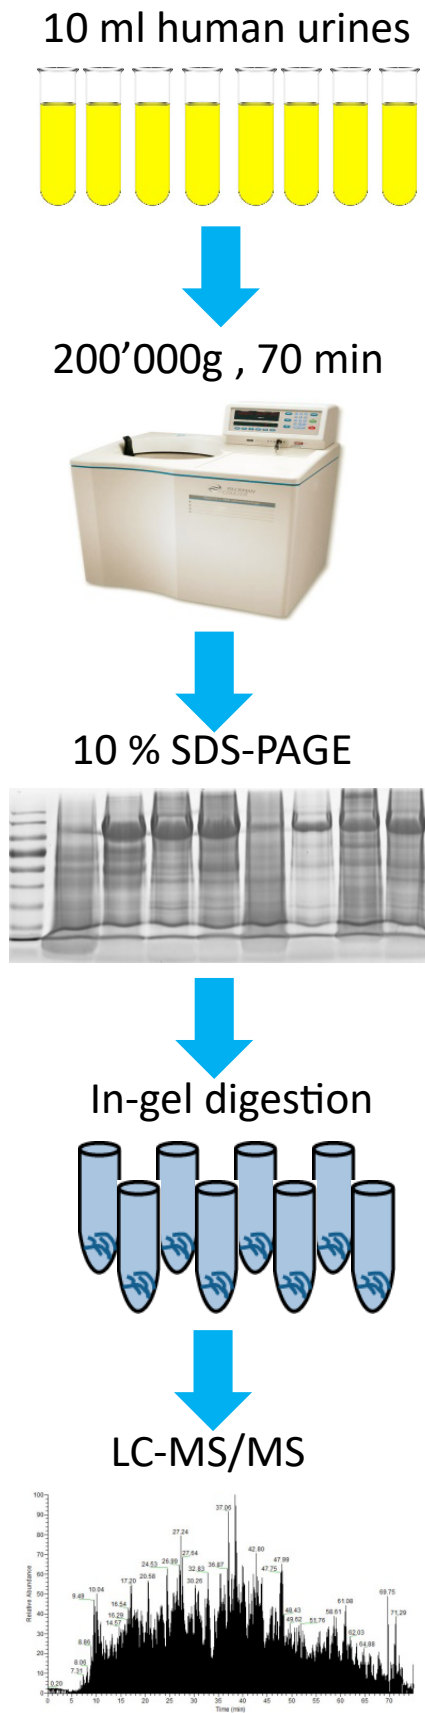**b****Cellular component categories of urine proteome**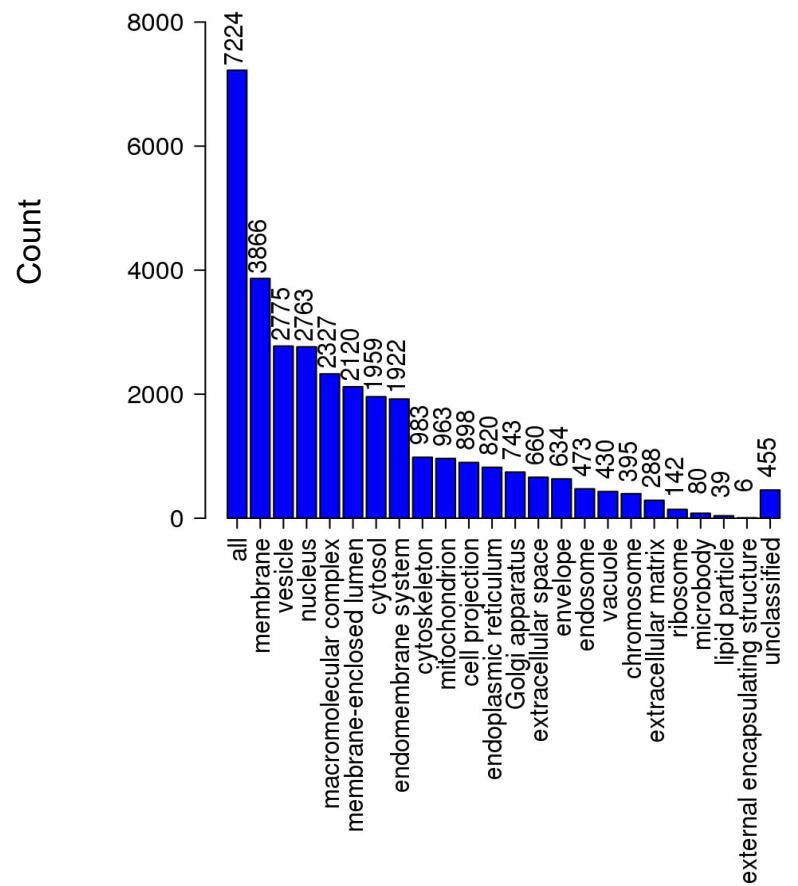**c****Relative abundance of exosomal markers**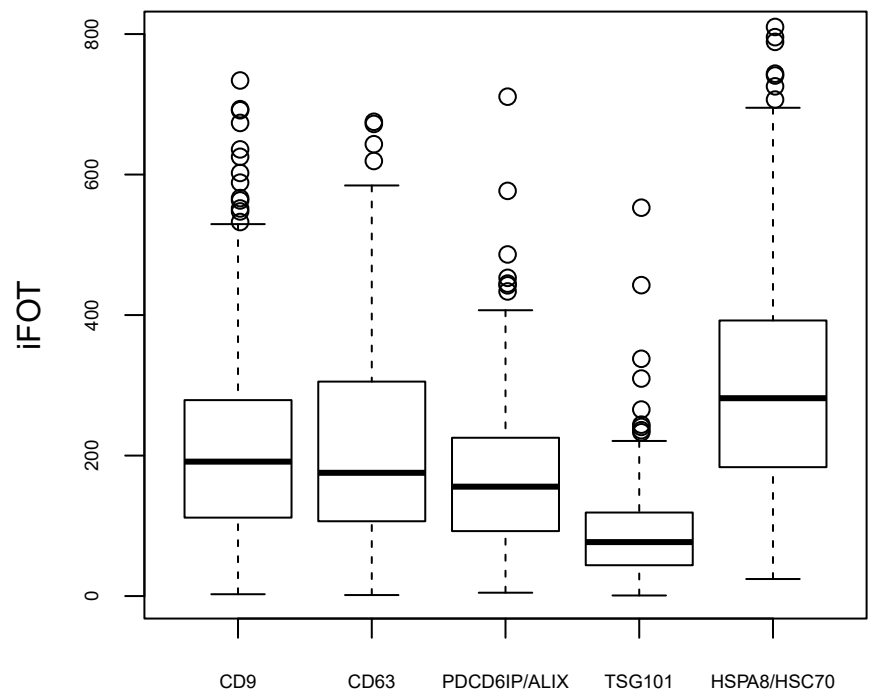

Supplement: mmc1.pdf [file mmc1.pdf]
