# Supplementary figures and images for: Urine Proteome Profiling Predicts Lung Cancer from Control Cases and Other Tumors
Source: PubMed Central journal article supplement — eBioMedicine. 2018 Mar 17;30:120–8. doi: 10.1016/j.ebiom.2018.03.009 (PMC5952250; doi:10.1016/j.ebiom.2018.03.009), 2018-03-17

**a**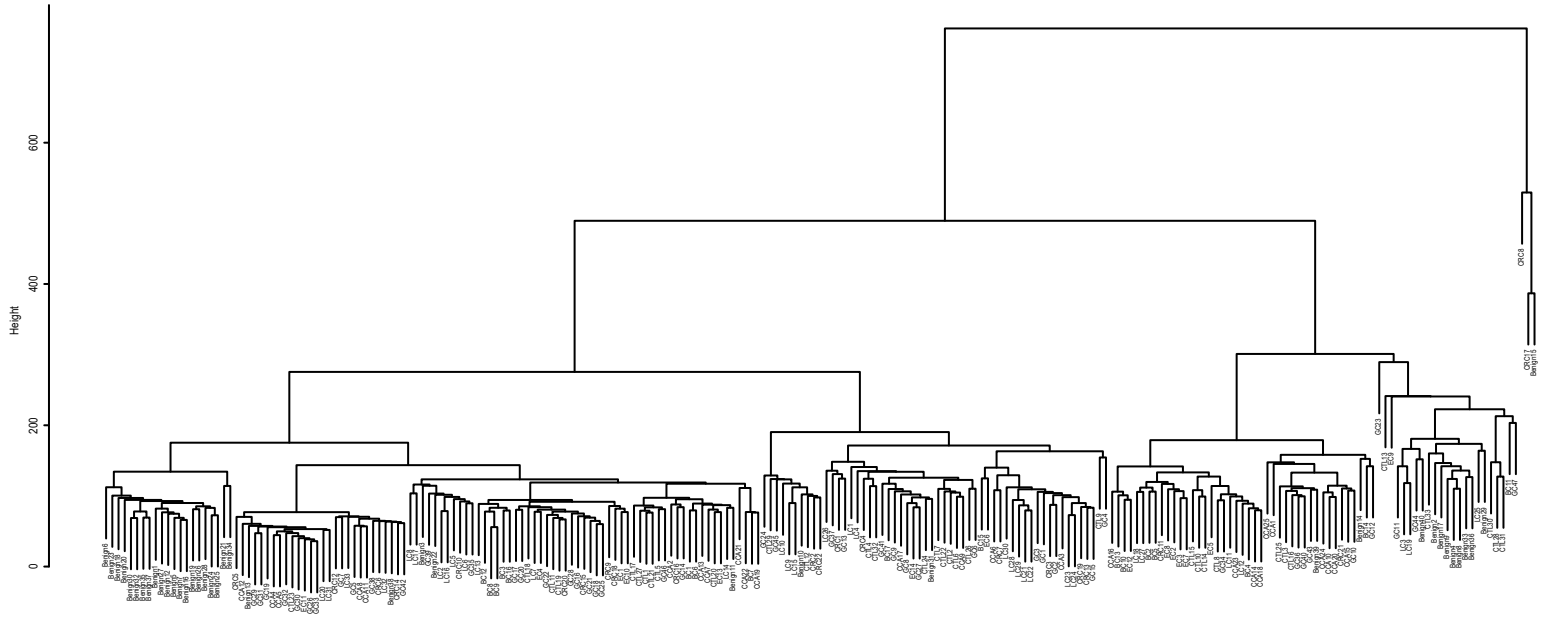**b**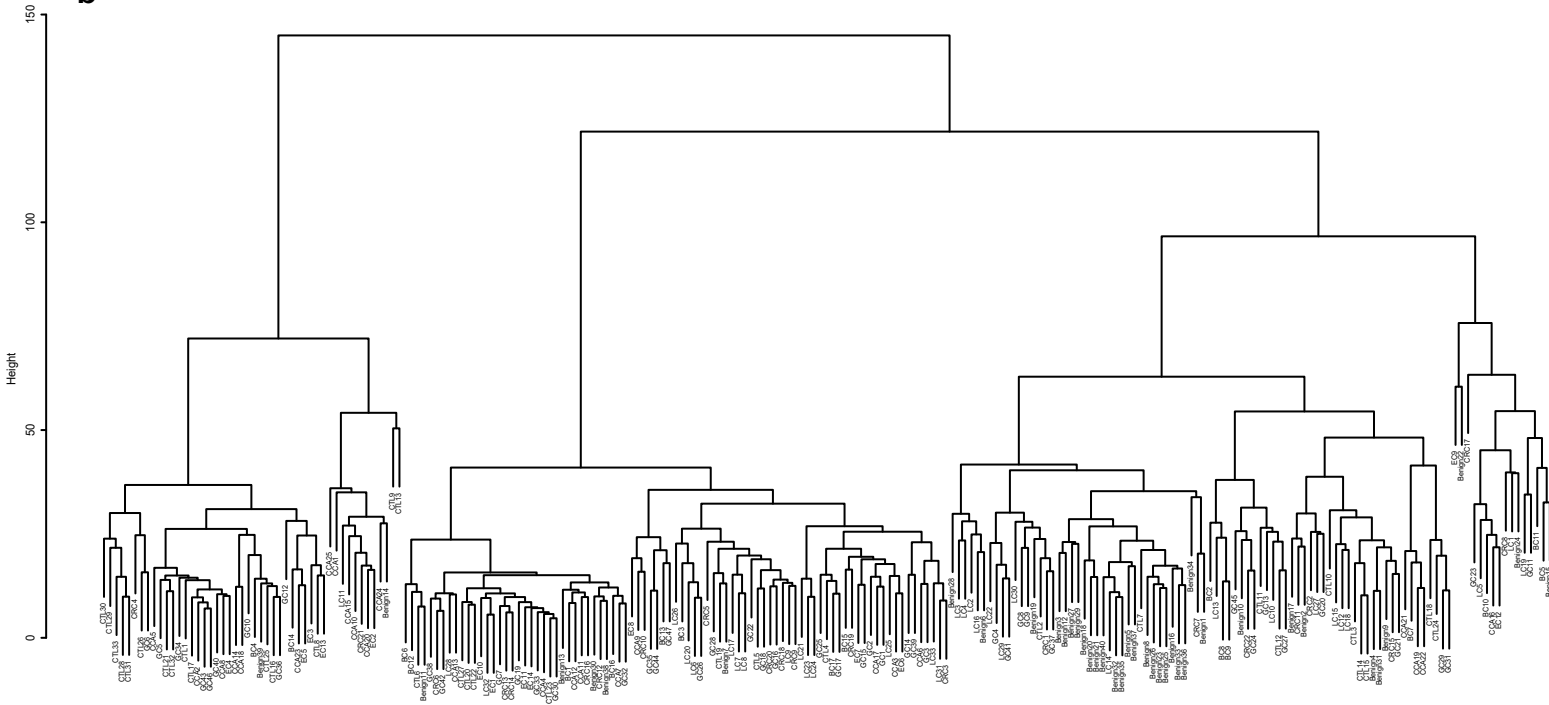**c**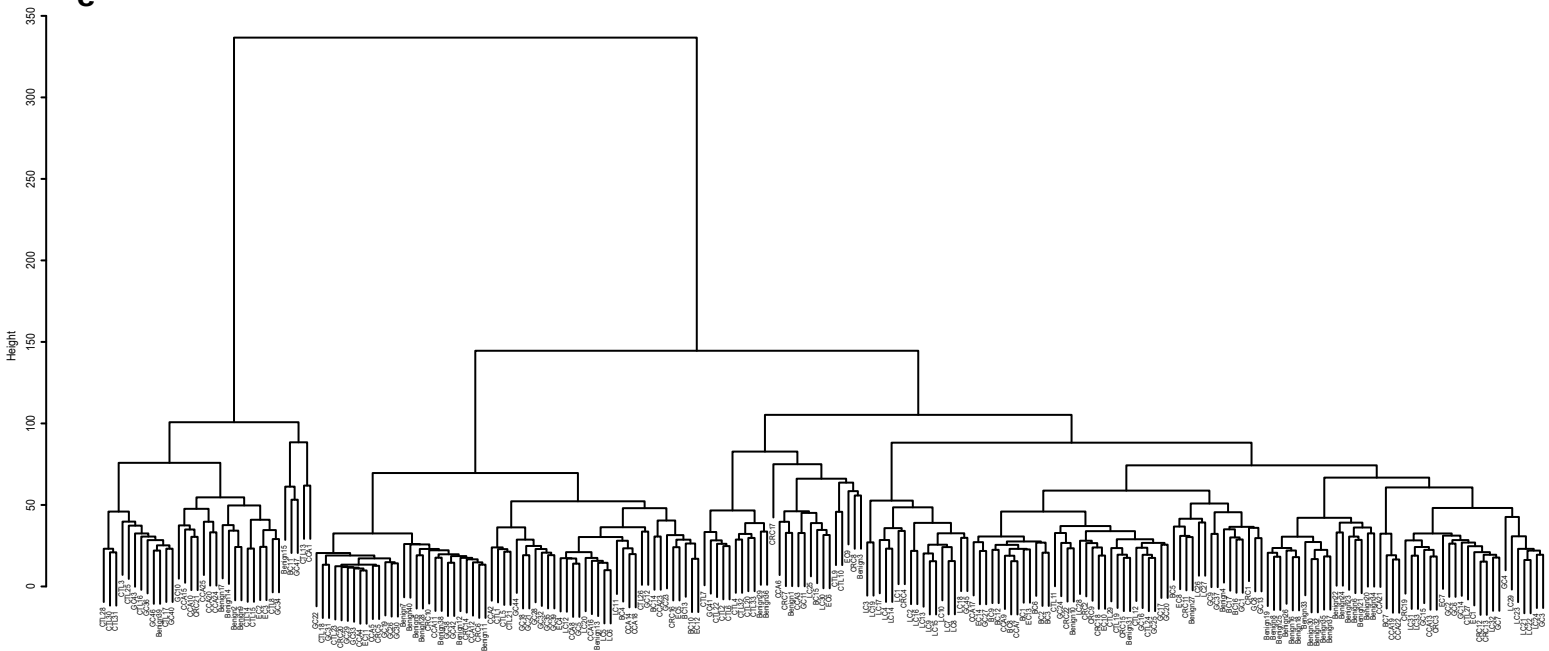

Supplement: mmc2.pdf [file mmc2.pdf]

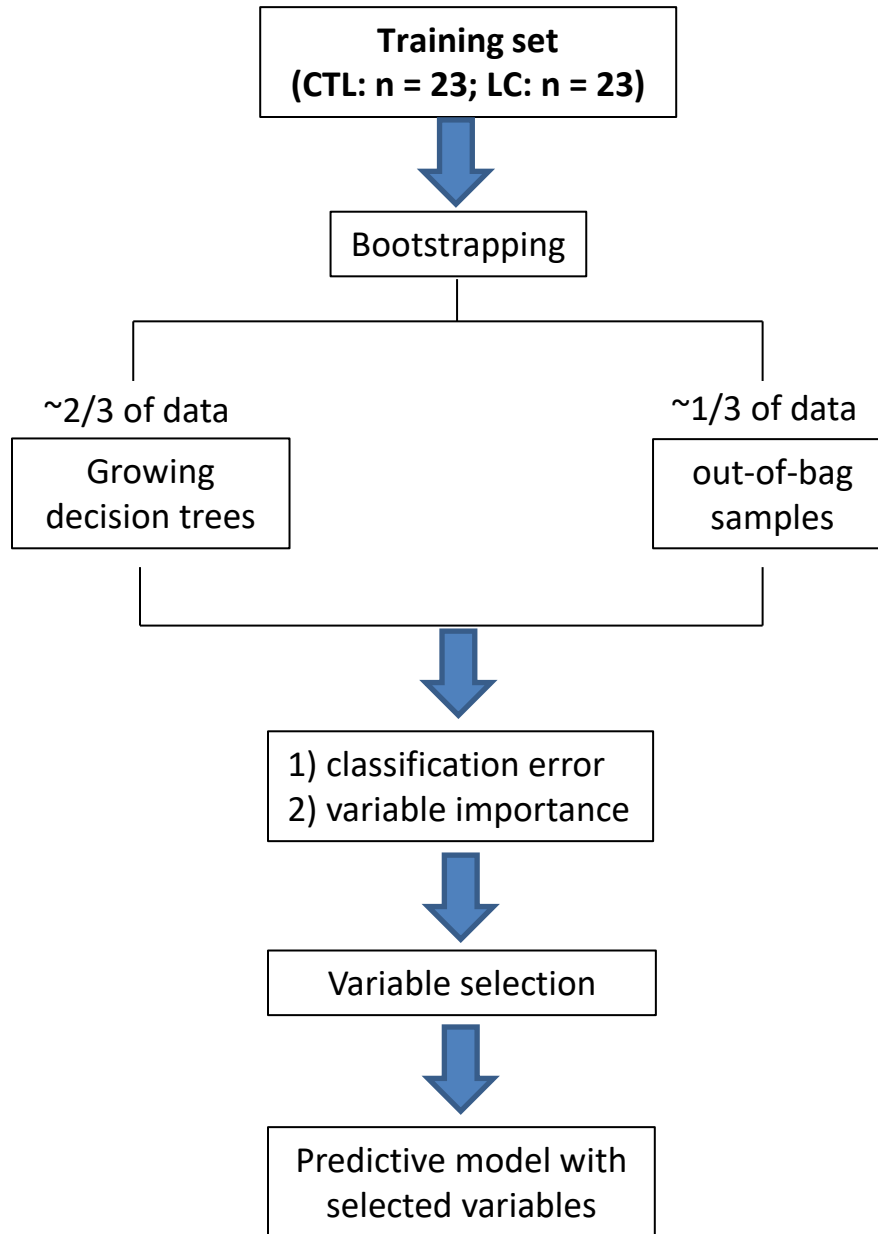

Supplement: mmc3.pdf [file mmc3.pdf]

**FTL**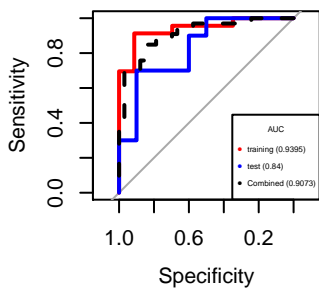**MAPK1IP1L**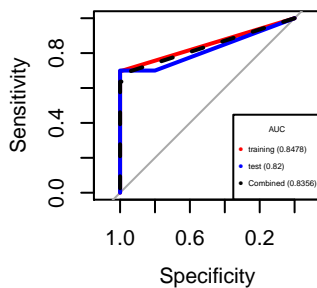**FGB**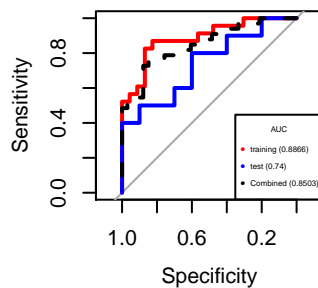**GNS**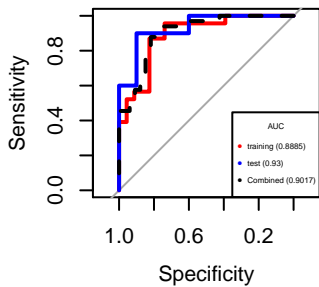**RAB33B**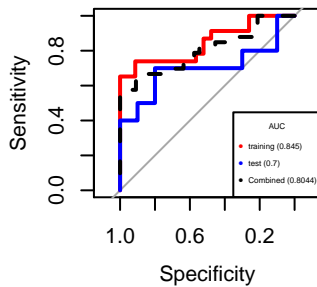**FGA**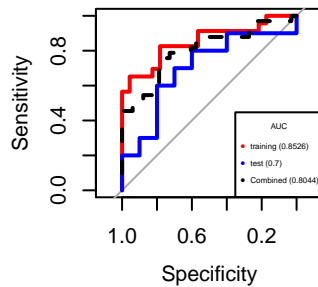**C9**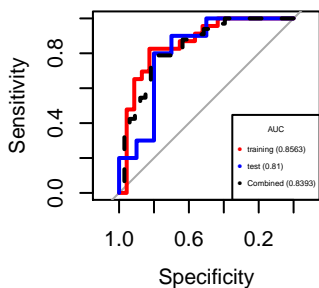**RAB15**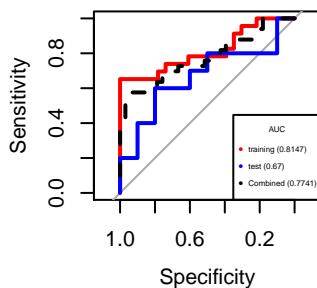**PEF1**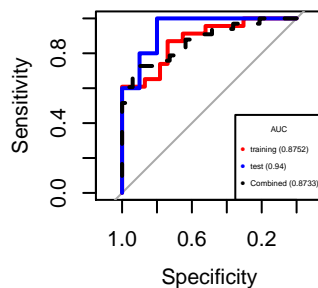**CETP**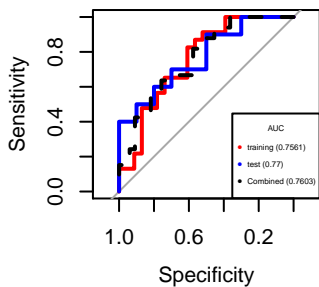**TMBIM1**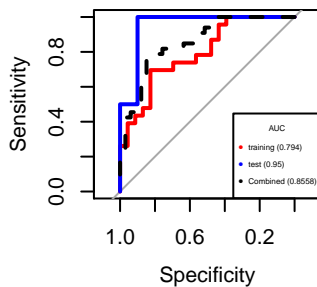**FTH1**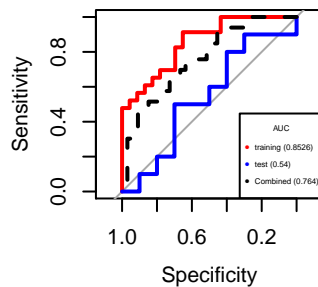**SLC25A11**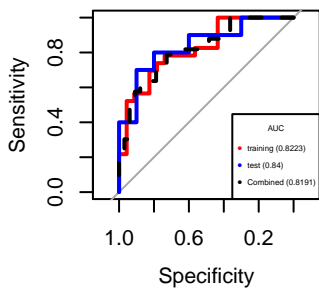**TMEM27**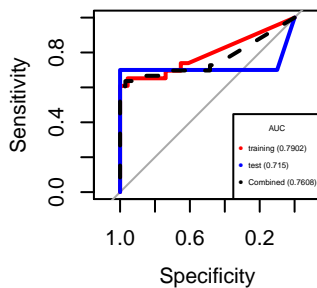**SLC9A3R1**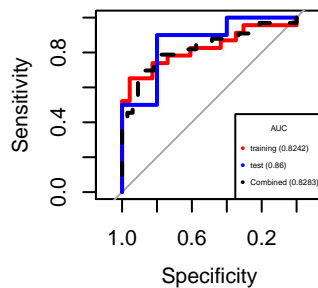

Supplement: mmc4.pdf [file mmc4.pdf]

**a** MDS plot with all variables

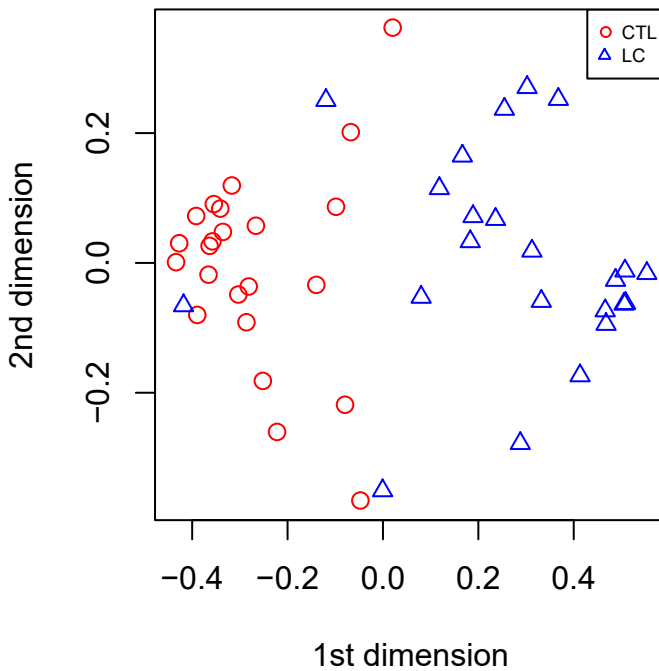

**b** MDS plot with 5 variables

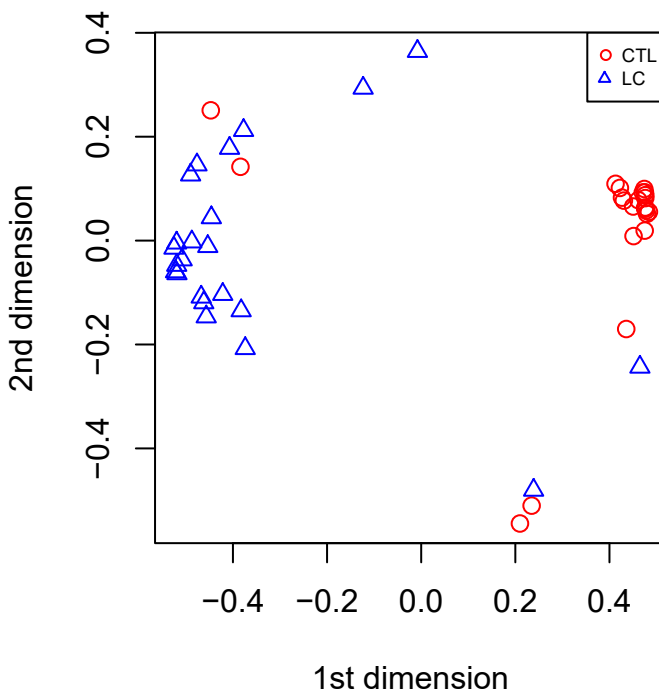

Supplement: mmc5.pdf [file mmc5.pdf]

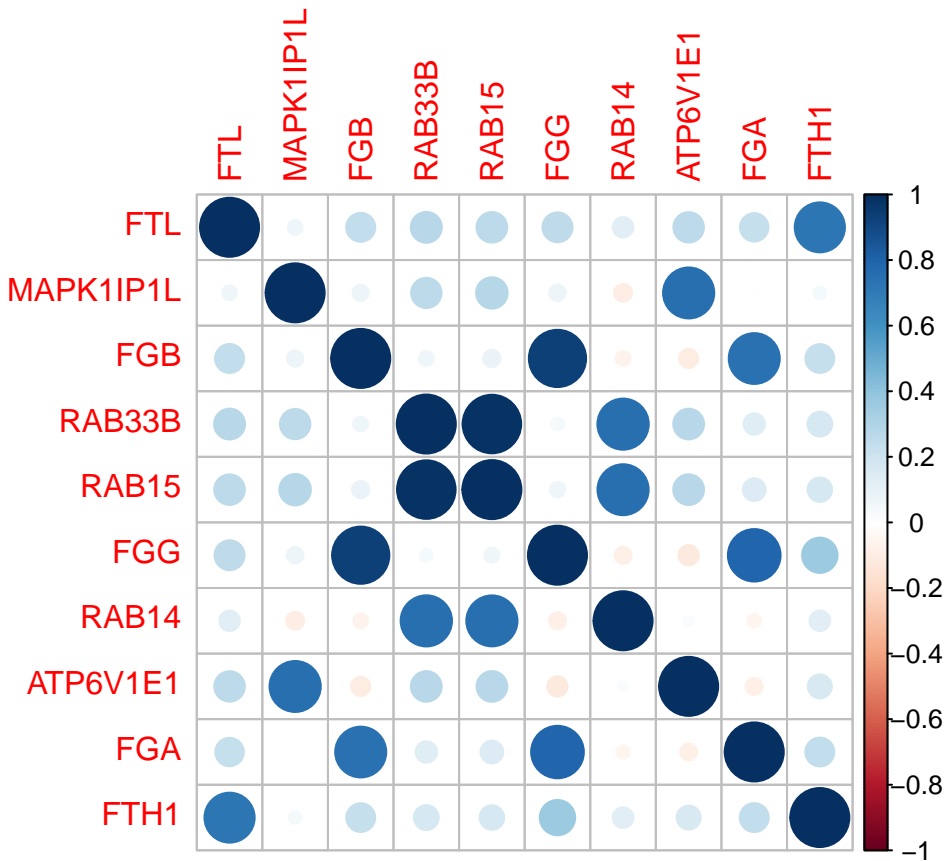

Supplement: mmc6.pdf [file mmc6.pdf]
